# Supplementary material
Source: Springer Nature journal article supplement (https://www.springermedizin.de/resource/supplementary/12885_2013_4475_MOESM5_ESM.pdf/9466514)
Supplement: MOESM5 [file 9466514]

**Additional file 5. Correlation Between the ratio of iSirt3/pSirt3 and Clinicopathologic Characteristics in 51 patients**

| Characteristic |     | Total | iSirt3/pSirt3 |    | <i>p</i> value |
|----------------|-----|-------|---------------|----|----------------|
|                |     |       | <1            | >1 |                |
| recurrence     | no  | 36    | 30            | 6  | 0.776          |
|                | yes | 15    | 12            | 3  |                |
| BCLC stage     | A   | 35    | 29            | 6  | 0.889          |
|                | B+C | 16    | 13            | 3  |                |

Note: 2 tests for all the analysis.
